# Supplementary material
Source: publisher site journal article supplement (https://www.dovepress.com/get_supplementary_file.php?f=436326.docx)
Supplement: Supplementary file 1 [file get_supplementary_file.php]

**Supplementary Table 1.** Screened variables those with significant difference between Glucocorticoids use or non-use by Chi-square test

|  | 2010-2016  (N=640) | | | 2017-2020  (N=452) | | |  |
| --- | --- | --- | --- | --- | --- | --- | --- |
| Characteristics | Glucocorticoids  (N=529) | No glucocorticoids  (N=111) | P | Glucocorticoids  (N=346) | No glucocorticoids  (N=106) | P | P over periods |
| Sex (male) | 369(69.8) | 88(79.3) | 0.043 | 253(73.1) | 82(77.4) | 0.385 | 0.283 |
| Age | 75.7±8.9 | 74.6±10.1 | 0.256 | 74.9±10.4 | 76.9±10.3 | 0.093 | 0.243 |
| History of smoking | 408(77.1) | 86(77.5) | 0.936 | 215(62.1) | 57(53.8) | 0.124 | **<0.001** |
| High-risk patients | 385 (72.8) | 53(47.7) | <0.001 | 172(49.7) | 34(32.1) | 0.001 | **<0.001** |
| AECOPD≥1 within the previous 12 months | 170 (32.1) | 18(16.2) | 0.001 | 178(51.4) | 33(31.1) | 0.001 | **<0.001** |
| Use of ICS at stable stage | 72 (13.6) | 12(10.8) | 0.427 | 81(23.4) | 7(6.6) | <0.001 | **<0.001** |
| FEV1 percentage predicted (%) | 49.7±17.3 | 59.2±19.8 | <0.001 | 51.1±18.6 | 63.1±19.4 | <0.001 | **<0.001** |
| Fever | 240 (45.4) | 44 (39.6) | 0.269 | 159(35.2) | 52(49.1) | 0.001 | **<0.001** |
| **Comorbidities** |  |  |  |  |  |  |  |
| Bronchial asthma | 117 (22.1) | 15 (13.5) | 0.042 | 93(20.6) | 5(4.7) | <0.001 | 0.258 |
| Hypertension | 294 (55.6) | 50 (45.0) | 0.043 | 261(57.7) | 52(49.1) | 0.039 | 0.158 |
| **Laboratory results** |  |  |  |  |  |  |  |
| Count of WBC (×109/L) | 7.77±3.66 | 7.81±3.54 | 0.916 | 7.84±3.30 | 8.05±3.17 | 0.567 | 0.771 |
| Neutrophils (%) | 72.0±11.6 | 69.4±11.8 | 0.032 | 71.00±10.97 | 71.02±12.02 | 0.989 | 0.209 |
| Eosinophils (%) | 1.2 (0.4-2.6) | 1.3 (0.6-2.5) | 0.420 | 1.4(0.6-3.0) | 1.2(0.5-2.5) | 0.040 | 0.331 |
| pH | 7.41±0.06 | 7.43±0.03 | <0.001 | 7.41±0.05 | 7.43±0.04 | <0.001 | 0.099 |
| PaO2 (mmHg) | 77.7±21.6 | 79.8±17.2 | 0.349 | 76.4±20.8 | 76.5±19.2 | 0.965 | **<0.001** |
| PaCO2 (mmHg) | 44.8±13.4 | 39.1±7.6 | <0.001 | 44.7±13.2 | 40.58±9.1 | 0.006 | **<0.001** |
| **Characteristics of chest CT** |  |  |  |  |  |  |  |
| Exudation | 122 (23.1) | 27(24.3) | 0.775 | 190(43.9) | 55(52.4) | 0.499 | **<0.001** |
| Chronic bronchitis | 355 (67.1) | 73(65.8) | 0.785 | 212(49.0) | 46(43.8) | 0.040 | **0.016** |
| **Outcomes** |  |  |  |  |  |  |  |
| Admission to ICU | 58 (11.0) | 5 (4.5) | 0.038 | 32(7.1) | 4(3.8) | 0.130 | 0.163 |
| Respiratory failure | 156(29.5) | 17(15.3) | 0.002 | 103(29.8) | 16(15.1) | 0.003 | 0.930 |
| Mechanical ventilation | 58 (11.0) | 2 (1.8) | 0.003 | 47(10.4) | 6(5.7) | 0.031 | 0.686 |
| Duration of hospitalization (days) | 9 (7-12) | 7 (6-10) | <0.001 | 9.8±7.7 | 8.1±4.4 | 0.026 | **0.045** |
| Death during hospitalization | 16 (3.0) | 1 (0.9) | 0.331 | 11(2.5) | 1(0.9) | 0.751 | **0.014** |

Data are shown as mean ± SD, median (IQR), or n (%). P<0.05 are shown as bold letters.
Normal values: count of WBC (×109/L), 3.5-9.5; neutrophils (%), 40-75; eosinophils (%), 0.5-5; C-reactive protein (mg/L), 0-5.
AE, Acute exacerbations; AECOPD, acute exacerbations of COPD; ICS, inhaled corticosteroid; FEV1, forced expiratory volume in one second; WBC, white blood cell; CT, computed tomography; ICU, intensive care unit.

**Supplementary Table 2.** Factors associated with glucocorticoids use patterns (selection of systemic glucocorticoids) among hospitalized patients with AECOPD (Data of 2010-2016)

| Variables | Univariable logistic regression | | | Multivariable logistic regression | | |
| --- | --- | --- | --- | --- | --- | --- |
| OR | 95% CI | P | OR | 95% CI | P |
| Male sex | 1.247 | 0.848-1.835 | 0.261 |  |  |  |
| Age | 0.996 | 0.976-1.016 | 0.664 |  |  |  |
| History of smoking | 0.948 | 0.620-1.449 | 0.804 |  |  |  |
| History of chronic cough | 1.009 | 0.997-1.022 | 0.159 |  |  |  |
| High-risk patients | 3.518 | 2.170-5.702 | **<0.001** | 2.540 | 1.533-4.210 | **<0.001** |
| ≥1 AECOPD within the previous 12 month | 1.524 | 1.044-2.224 | **0.029** |  |  |  |
| Use of ICS at stable stage | 2.252 | 1.363-3.721 | **0.002** | 1.604 | 0.957-2.687 | 0.073 |
| Fever | 1.143 | 0.798-1.638 | 0.466 |  |  |  |
| Chronic cor pulmonale | 2.067 | 1.411-3.029 | **<0.001** | 1.457 | 0.932-2.278 | 0.099 |
| Bronchial asthma | 2.839 | 1.863-4.325 | **<0.001** | 3.023 | 1.952-4.682 | **<0.001** |
| Hypertension | 1.239 | 0.862-1.780 | 0.247 |  |  |  |
| Type 2 diabetes | 0.786 | 0.504-1.227 | 0.290 |  |  |  |
| Old tuberculosis | 0.857 | 0.552-1.329 | 0.490 |  |  |  |
| Ischemic heart disease | 1.480 | 1.031-2.124 | **0.034** | 1.460 | 1.000-2.133 | 0.050 |
| Osteoporosis | 0.685 | 0.282-1.660 | 0.402 |  |  |  |
| Count of WBC | 1.002 | 0.954-1.052 | 0.936 |  |  |  |
| Percentage of Neutrophils | 1.022 | 1.005-1.038 | **0.009** | 1.018 | 1.000-1.036 | **0.046** |
| Count of Neutrophils | 1.014 | 0.964-1.067 | 0.581 |  |  |  |
| Percentage of Eosinophils | 0.992 | 0.937-1.050 | 0.779 |  |  |  |
| Count of Eosinophils | 0.801 | 0.348-1.842 | 0.601 |  |  |  |
| pH | 1.164 | 1.014-1.338 | **0.032** |  |  |  |
| PaO2 (mmHg) | 1.008 | 1.001-1.015 | **0.022** |  |  |  |
| PaCO2 (mmHg) | 1.035 | 1.022-1.048 | **<0.001** | 1.031 | 1.018-1.045 | **<0.001** |
| Exudation on chest CT | 0.740 | 0.478-1.148 | 0.179 |  |  |  |
| Chronic bronchitis on chest CT | 1.428 | 0.966-2.111 | **0.074** |  |  |  |

AECOPD, acute exacerbations of COPD; ICS, inhaled corticosteroid; WBC, white blood cell; CT, computed tomography.

P<0.05 are shown as bold letters.

**Supplementary Table 3.** Factors associated with glucocorticoids use patterns (selection of systemic glucocorticoids) among hospitalized patients with AECOPD (Data of 2017-2020)

| Variables | Univariable logistic regression | | | Multivariable logistic regression | | |
| --- | --- | --- | --- | --- | --- | --- |
| OR | 95% CI | P | OR | 95% CI | P |
| Male sex | 1.050 | 0.599-1.840 | 0.866 |  |  |  |
| Age | 1.000 | 0.976-1.024 | 0.995 |  |  |  |
| History of smoking | 1.738 | 1.015-2.975 | **0.044** |  |  |  |
| History of chronic cough | 1.002 | 1.001-1.004 | 0.005 |  |  |  |
| High-risk patients | 2.151 | 1.295-3.574 | **0.003** |  |  |  |
| ≥1 AECOPD within the previous 12 month | 1.232 | 0.859-1.768 | 0.257 |  |  |  |
| Use of ICS at stable stage | 3.667 | 2.137-6.293 | **<0.001** | 2.769 | 1.509-5.080 | **0.001** |
| Fever | 0.674 | 0.390-1.163 | 0.156 |  |  |  |
| Bronchial asthma | 2.272 | 1.315-3.927 | **0.003** | 1.848 | 0.993-3.443 | 0.053 |
| Hypertension | 1.817 | 1.068-3.091 | **0.028** |  |  |  |
| Type 2 diabetes | 0.859 | 0.464-1.589 | 0.628 |  |  |  |
| Old tuberculosis | 1.142 | 0.629-2.072 | 0.662 |  |  |  |
| Ischemic heart disease | 0.912 | 0.547-1.520 | 0.723 |  |  |  |
| Osteoporosis | 1.403 | 0.509-3.588 | 0.479 |  |  |  |
| Count of WBC | 1.071 | 0.998-1.150 | 0.057 |  |  |  |
| Percentage of Neutrophils | 1.028 | 1.005-1.053 | **0.019** |  |  |  |
| Count of Neutrophils | 1.081 | 1.004-1.164 | **0.039** | 1.110 | 1.023-1.204 | **0.012** |
| Percentage of Eosinophils | 0.982 | 0.878-1.099 | 0.757 |  |  |  |
| Count of Eosinophils | 0.945 | 0.352-2.536 | 0.911 |  |  |  |
| PaO2 (mmHg) | 1.006 | 0.994-1.018 | 0.326 |  |  |  |
| PaCO2 (mmHg) | 1.043 | 1.025-1.062 | **<0.001** | 1.046 | 1.026-1.065 | **<0.001** |
| Exudation on chest CT | 0.871 | 0.563-1.348 | 0.536 |  |  |  |
| Chronic bronchitis on chest CT | 1.182 | 0.773-1.809 | 0.440 |  |  |  |

AECOPD, acute exacerbations of COPD; ICS, inhaled corticosteroid; WBC, white blood cell; CT, computed tomography.

P<0.05 are shown as bold letters.

**Supplementary Table 4.** Characteristics at baseline and outcomes of GOLD C/D subgroup over two periods

|  | 2010-2016 (n=438) | 2017-2020(n=206) | P |
| --- | --- | --- | --- |
| Age (years) | 75.41±9.08 | 75.33±10.62 | 0.918 |
| Male | 306(69.9%) | 150(72.8%) | 0.442 |
| History of smoking | 343(78.3%) | 125(60.7%) | **<0.001** |
| ICS use without systemic corticosteroids | 226(51.6%) | 126(61.2%) | **0.023** |
| Systemic corticosteroids use without ICS | 6(1.4%) | 1(0.5%) | 0.440 |
| ICS+systemic corticosteroids use | 153(34.9%) | 45(21.8%) | **0.001** |
| Respiratory Failure | 161(36.8%) | 79(38.3%) | 0.697 |
| Mechanical ventilation | 59(13.5%) | 38(18.4%) | 0.100 |
| Hospital duration (days) | 11.73±11.40 | 10.57±9.33 | 0.204 |
| Intrahospital mortality | 15(3.4%) | 9(4.4%) | 0.531 |
| Recurrence within 30 d after discharge | 22(5.2%) | 10(5.1%) | 0.959 |
| Recurrence within 1 year after discharge | 167(39.5%) | 57(29.2%) | **0.014** |

Data are shown as mean ± SD, median (IQR), or n (%); P<0.05 are shown as bold letters.
